# Supplementary material
Source: HighWire-hosted journal article supplement (doi:10.1101/rna.080161.124)
Supplement: Supplemental_Legends.docx [file Supplemental_Legends.docx]

**Supplementary Figure 1. Conservation and targeting of the mouse *Vaultrc5* locus. (A)** Genome browser view of the syntenic region containing the *Vaultrc5* and its conserved upstream neighbor *Zmat2*. PhyloP basewise conservation scores for Placental mammals and for Vertebrates, as well as UCSC Refseq gene annotations are shown. **(B)** As in (A) but zoomed in on *Vaultrc5* locus. Vertical doted lines highlight the position of the inserted *loxP* sites in the conditional allele. Position of known regulatory elements are shown below. **(C)** sequence alignment of the conserved regions between *Vaultrc5* and the three human *vtRNA1* genes which overlap the A and B2 boxes (in green) and the termination sequence (in red). Dots highlight the nucleotides that differ between the murine gene and at least one of the human *vtRNA1* genes. Grey boxes highlight the nucleotides that differ between *Vaultrc5* and *vtRNA1-1*. **(D)** Sanger sequencing of the integrated donor template showing the position of the loxP sites, the XmnI restriction sites, and the PAMs of the gRNAs used.

**Supplementary Figure 2. Analysis of putative miRNAs derived from the *Vaultrc5* locus. (A)** Comparison of the predicted human and mouse vaultRNA-derived miRNAs. The seed-sequence is highlighted in bold. Nucleotides that differ between the two species are highlighted in pink **(B)** Genome browser view of sequencing reads over *Vaultrc5* and *pre-mmu-miR-19a* loci in multiple adult mouse tissues in triplicate sequencing experiments **(C)** Abundance of reads (as RPM) for predicted vaultRNA-derived fragments. Error bars represent standard deviation between triplicate experiments. **(D)** As in (C) but for *miR-19a-3p* and *miR-19a-5p*.

**Supplementary Figure 3. Complete blood counts for *Vautrc5-/-* and*Vautrc5-/-* animals.** Cell count for White blood cells **(A)**, Red blood cells **(B)**, Platelets, **(C)**. Assessed hemoglobin levels by Hematocrit **(D)**, Mean Red Blood Cell volume **(E)**, Red Blood Cell distribution width **(F)**, Hemoglobin **(G)**, Mean cell hemoglobin **(H)**, Mean cell hemoglobin concentration **(I)**. Error bars represent standard deviation between biological replicates. p-values were calculated with a t-test and are highlighted in green when below the significance threshold of 0.05.
